# Supplementary figures and images for: The cleavage of phosphodiester bonds within small RNA bulges in the presence and absence of metal ion catalysts †
Source: Royal Society of Chemistry journal article supplement (doi:10.1039/b102519h), 2001-01-01

Compound 4

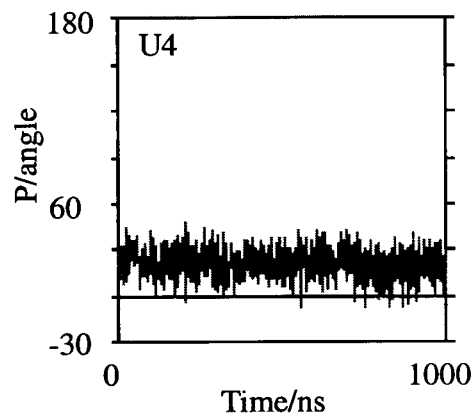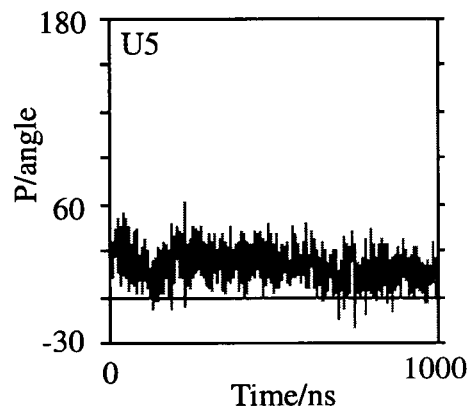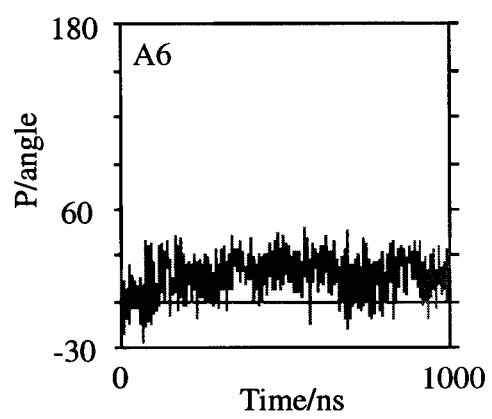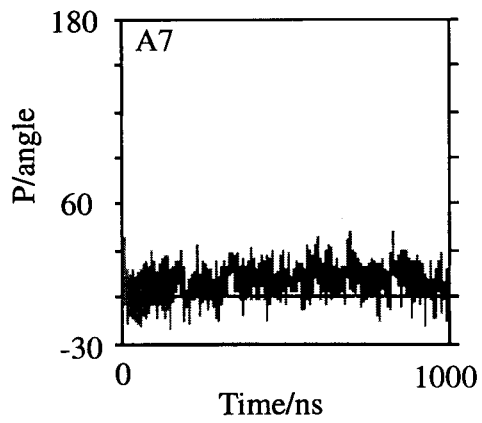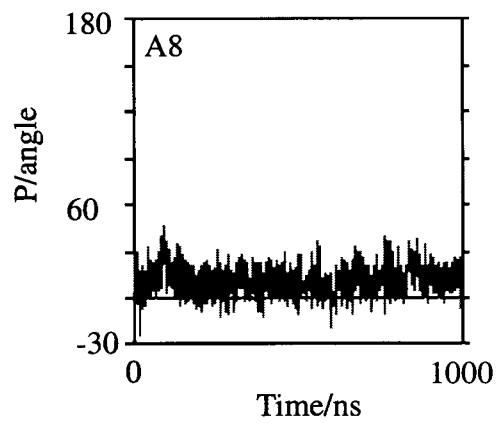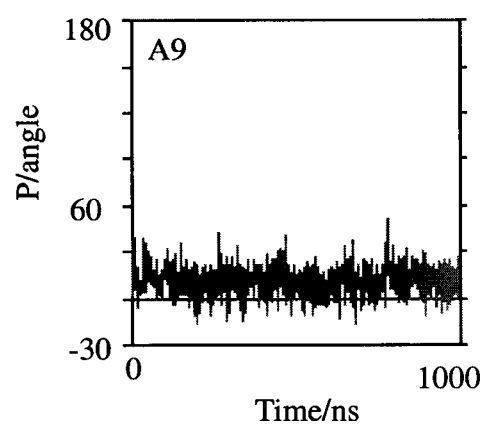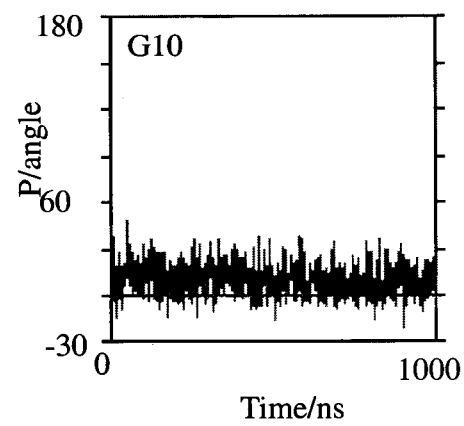

Compound 6

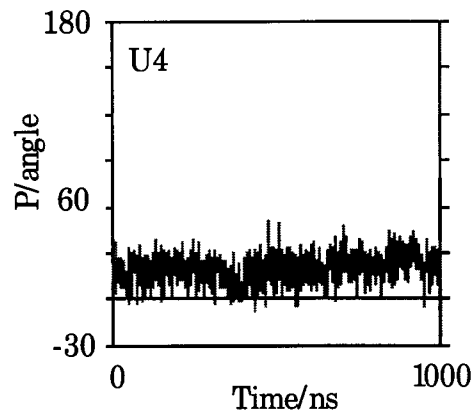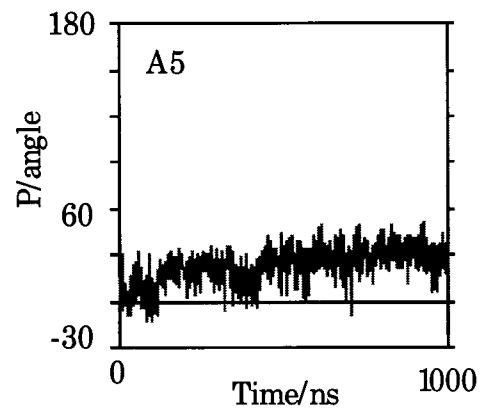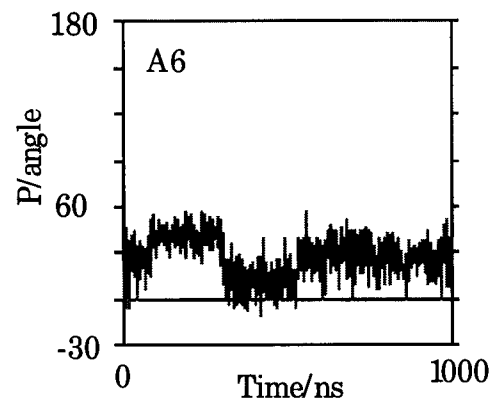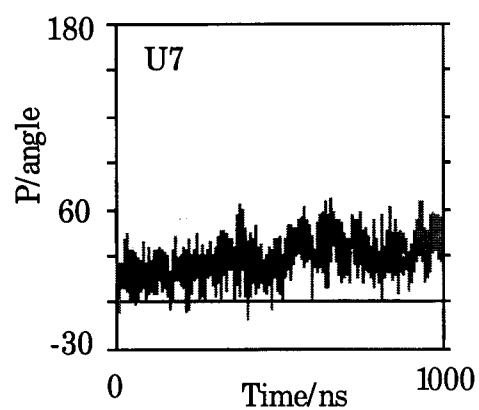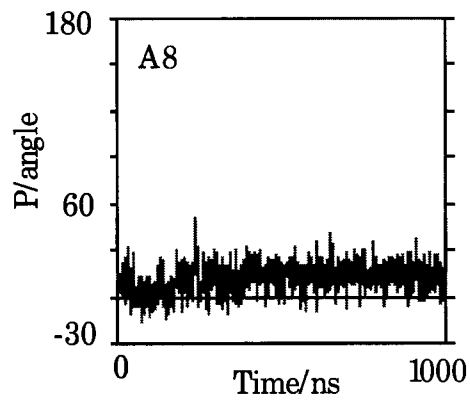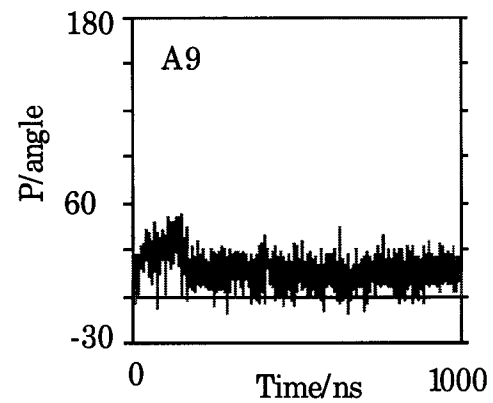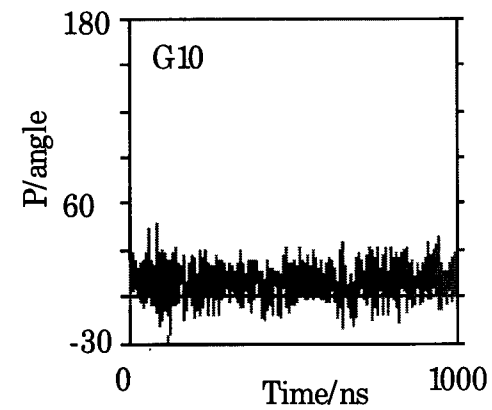

Campand 13

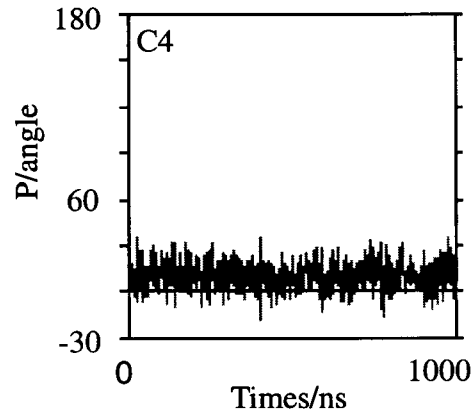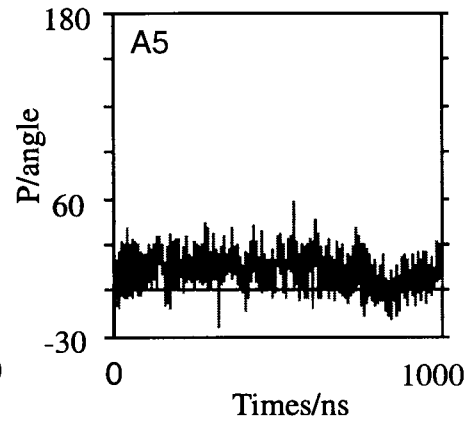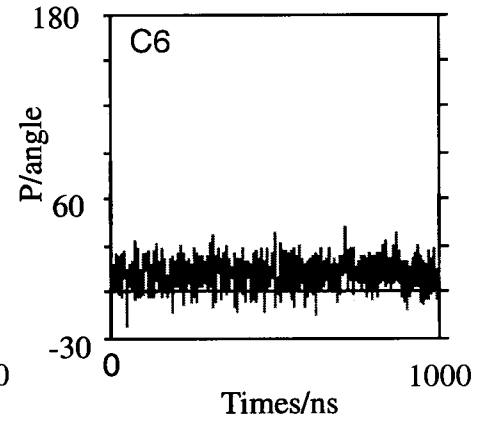

Compound 4

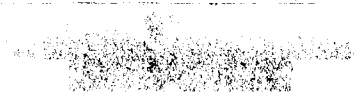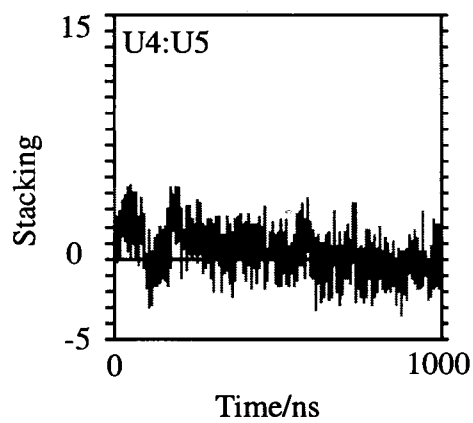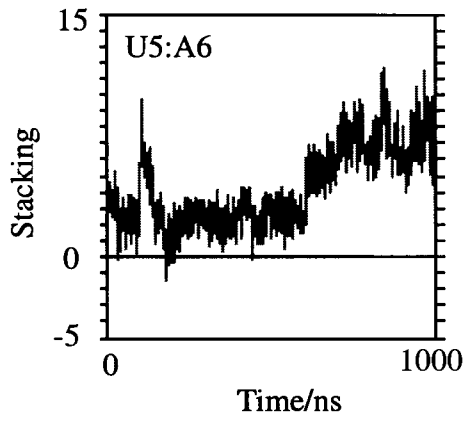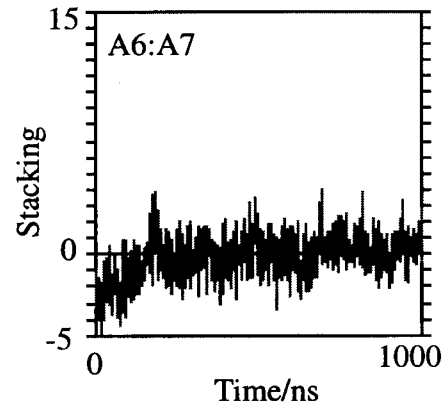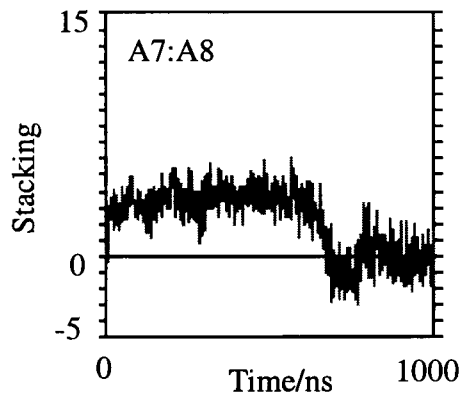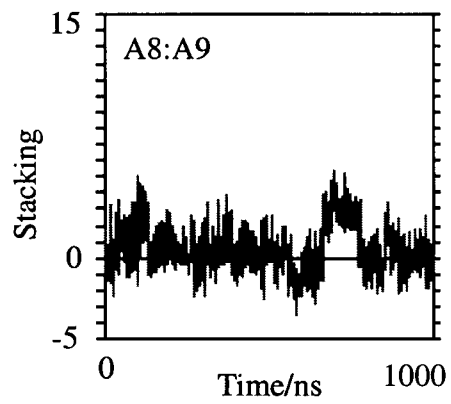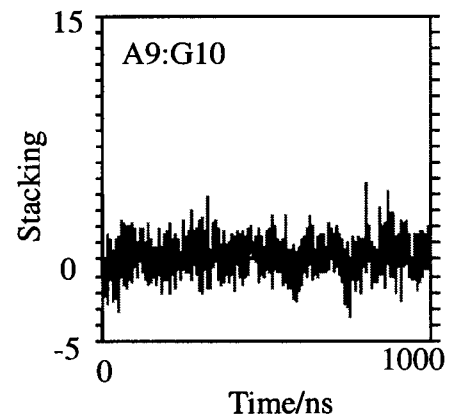

Compound 6

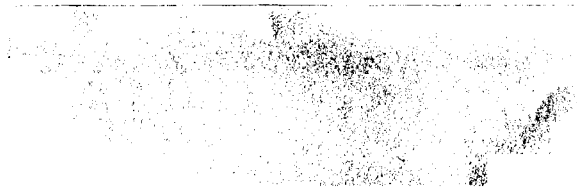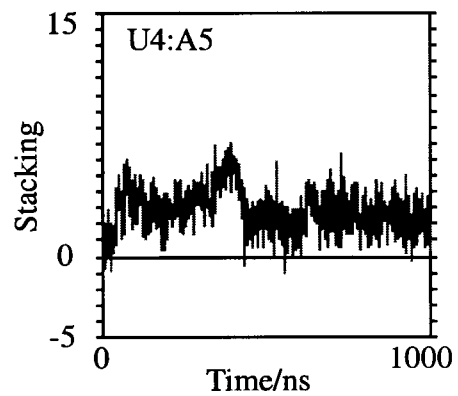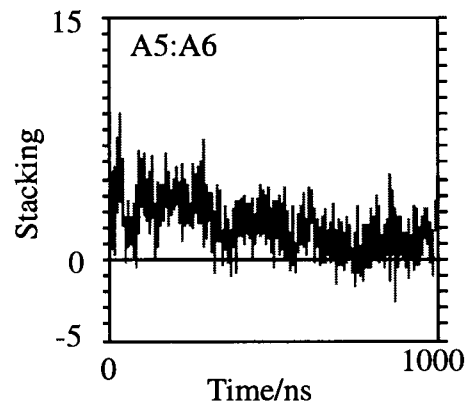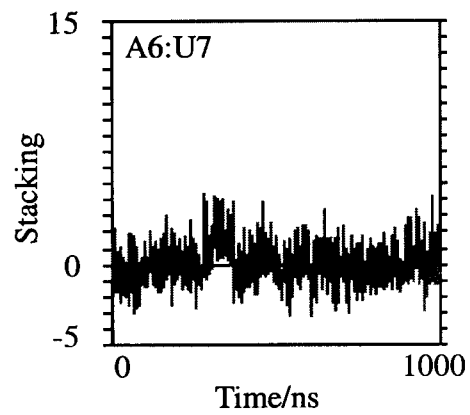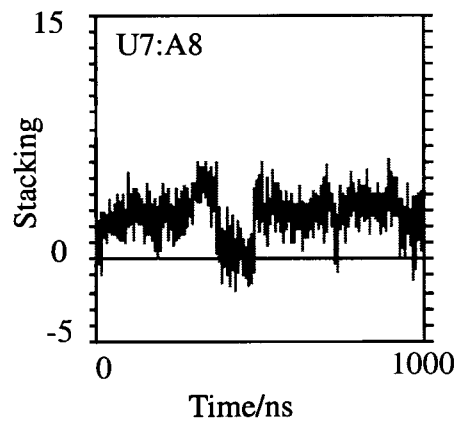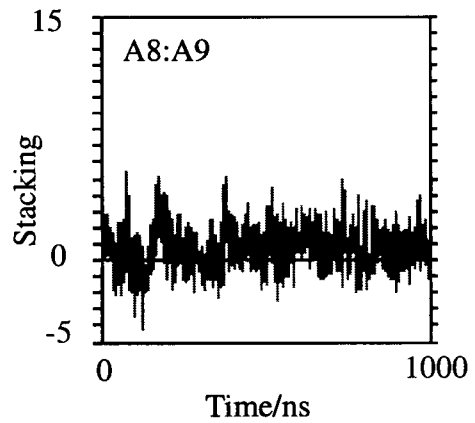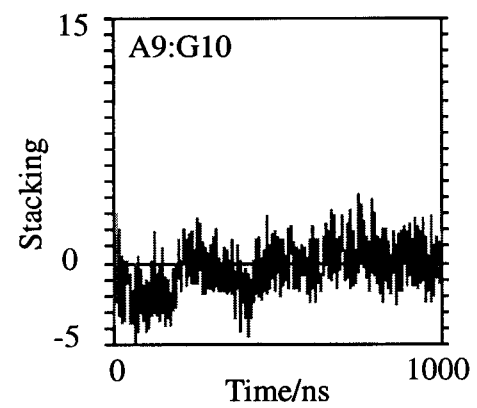

Compound 13

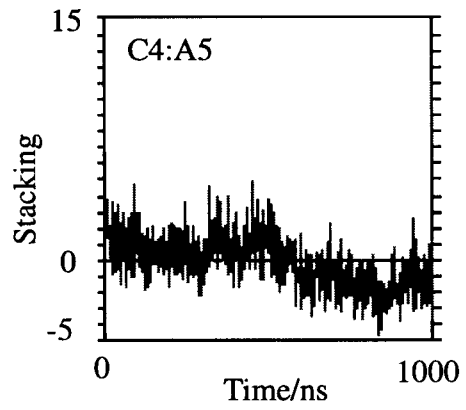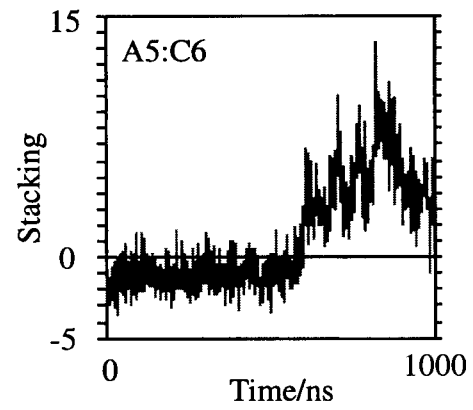

Supplement: b102519h.pdf [file b102519h.pdf]
